# Supplementary material
Source: Springer Nature journal article supplement (https://www.springermedizin.de/resource/supplementary/12884_2014_1062_MOESM2_ESM.pdf/9458804)
Supplement: MOESM2 [file 9458804]

### *Effects of low-moderate drinking*

Excessive alcohol is always going to be damaging to the woman and the baby. But whether or not if you have a glass of wine with your dinner two or three nights a week if that is going to affect the baby or not, I will probably debate. Probably, say that it wouldn't have any effect on that baby (M2).

### *Drinking in first trimester*

I don't know if we really know what the effects of alcohol are on the developing fetus. I am not too sure about that. I think it is more to do with continuing drinking through pregnancy. I mean if you drank alcohol without knowing that you have conceived or in early times of conception, it doesn't seem to affect (the baby). I would have said that it doesn't affect (the baby) because so many people have done it, you know (M14).
